# Supplementary material for: Colorimetric detection of achiral anions and chiral carboxylates by a chiral thiourea—phthalimide dyad
Source: Royal Society of Chemistry journal article supplement (doi:10.1039/c0pp00175a), 2010-09-06
Supplement: c0pp00175a.pdf [file c0pp00175a.pdf]

---

## SUPPLEMENTARY INFORMATION –

# Colorimetric Detection of Achiral Anions and Chiral Carboxylates by a Chiral Thiourea-Phthalimide Dyade

---

Axel G. Griesbeck,\* Sebastian Hanft and Yrene Diaz Miara

*Contribution from the Department of Chemistry, University of Cologne, Greinstr. 4,  
D-50939 Köln, Germany.*

E-mail: griesbeck@uni-koeln.de

### Table of Contents

|                                                                                                                                                                                     |   |
|-------------------------------------------------------------------------------------------------------------------------------------------------------------------------------------|---|
| <b>Fig. 10</b> Absorption spectra of <b>1</b> ( $3.3 \times 10^{-5}$ M) in the presence of increasing amounts of chloride (0.033 → 0.3 mM) in acetonitrile.                         | 2 |
| <b>Fig. 11</b> Absorption spectra of <b>1</b> ( $3.3 \times 10^{-5}$ M) in the presence of increasing amounts of iodide (0.033 → 0.3 mM) in acetonitrile.                           | 2 |
| <b>Fig. 12</b> Changes in $^1\text{H}$ NMR (300MHz) spectra of <b>1</b> in DMSO upon addition of acetate.                                                                           | 3 |
| <b>Fig. 13</b> Changes in $^1\text{H}$ NMR (300MHz) spectra of <b>1</b> in DMSO upon addition of dihydrogenphosphate.                                                               | 3 |
| <b>Fig. 14</b> Changes in $^1\text{H}$ NMR (300MHz) spectra of <b>1</b> in DMSO upon addition of L-lactate.                                                                         | 4 |
| <b>Fig. 15</b> Changes in $^1\text{H}$ NMR (300MHz) spectra of <b>1</b> in DMSO upon addition of chloride.                                                                          | 4 |
| <b>Fig. 16</b> Absorption spectra of <b>1</b> ( $3.3 \times 10^{-5}$ M) in the presence of increasing amounts of DBU (0.033 → 0.3 mM) in acetonitrile.                              | 5 |
| <b>Fig. 17</b> Absorption spectra of <b>1</b> ( $3.3 \times 10^{-5}$ M) in the presence of a large fluoride excess and sensor reversibility after addition of methanol.             | 6 |
| <b>Fig. 18</b> Absorption spectra of <b>1</b> ( $3.3 \times 10^{-5}$ M) in the presence of a large excess of the base DBU and sensor reversibility after addition of methanol.      | 6 |
| <b>Fig. 19</b> Absorption spectra of <b>1</b> ( $3.3 \times 10^{-5}$ M) in the presence of a large acetate excess and sensor reversibility after addition of methanol.              | 7 |
| <b>Fig. 20</b> Absorption spectra of <b>1</b> ( $3.3 \times 10^{-5}$ M) in the presence of a large dihydrogen phosphate excess and sensor reversibility after addition of methanol. | 7 |

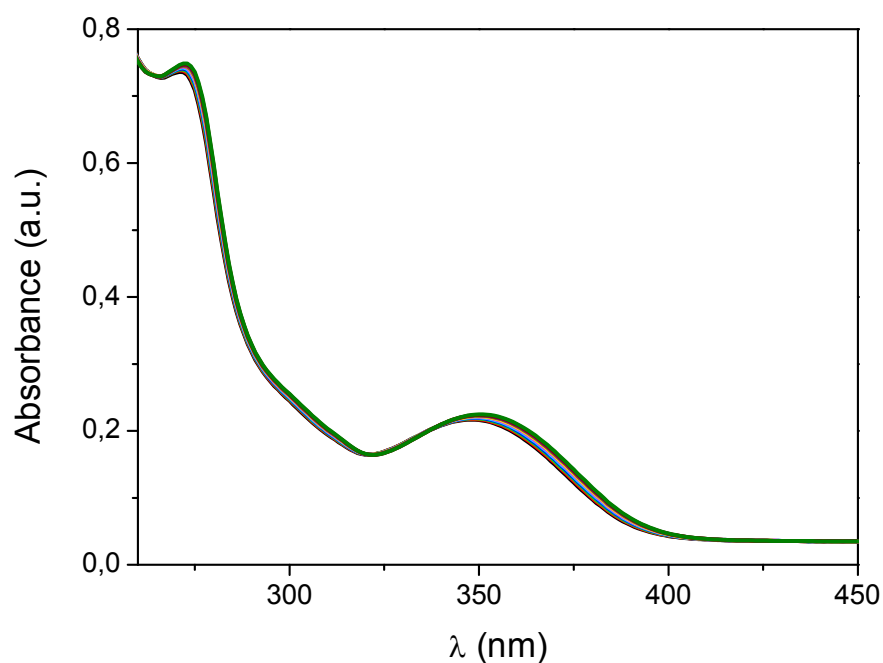

**Fig. 10** Absorption spectra of **1** ( $3.3 \times 10^{-5}$  M) in the presence of increasing amounts of chloride (0.033  $\rightarrow$  0.33 mM) in acetonitrile.

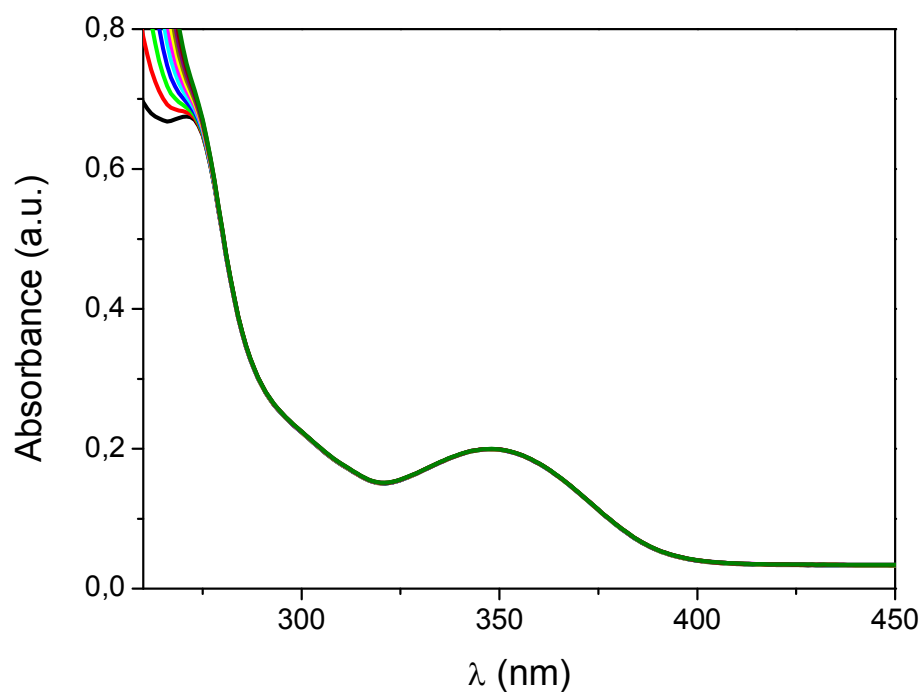

**Fig. 11** Absorption spectra of **1** ( $3.3 \times 10^{-5}$  M) in the presence of increasing amounts of iodide (0.033  $\rightarrow$  0.33 mM) in acetonitrile.

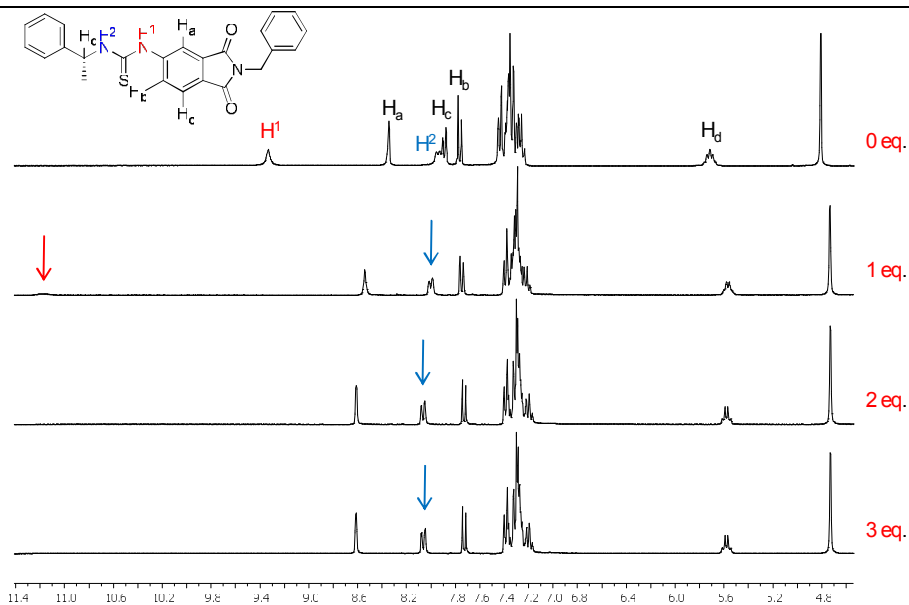

Fig. 12 Changes in  $^1\text{H}$  NMR (300MHz) spectra of **1** in DMSO upon addition of acetate.

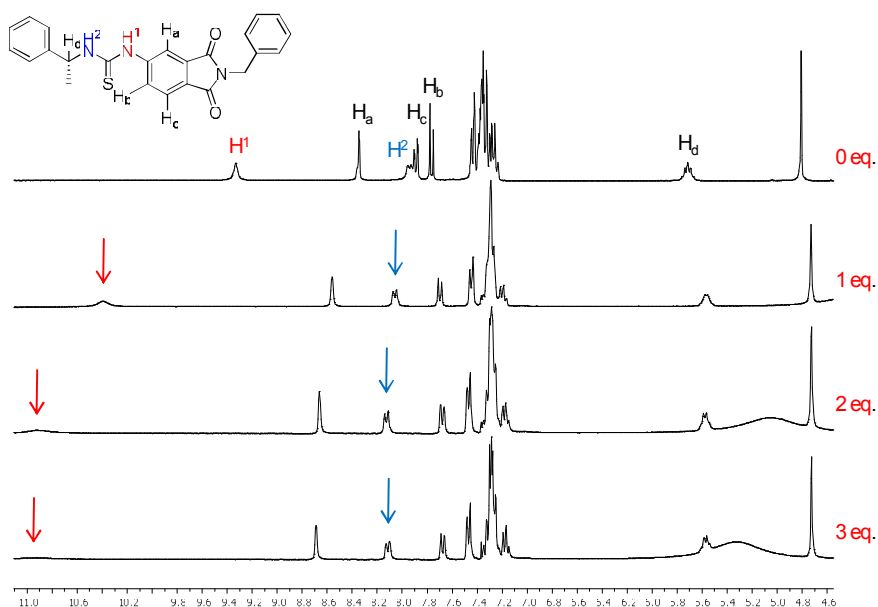

Fig. 13 Changes in  $^1\text{H}$  NMR (300MHz) spectra of **1** in DMSO upon addition of dihydrogenphosphate.

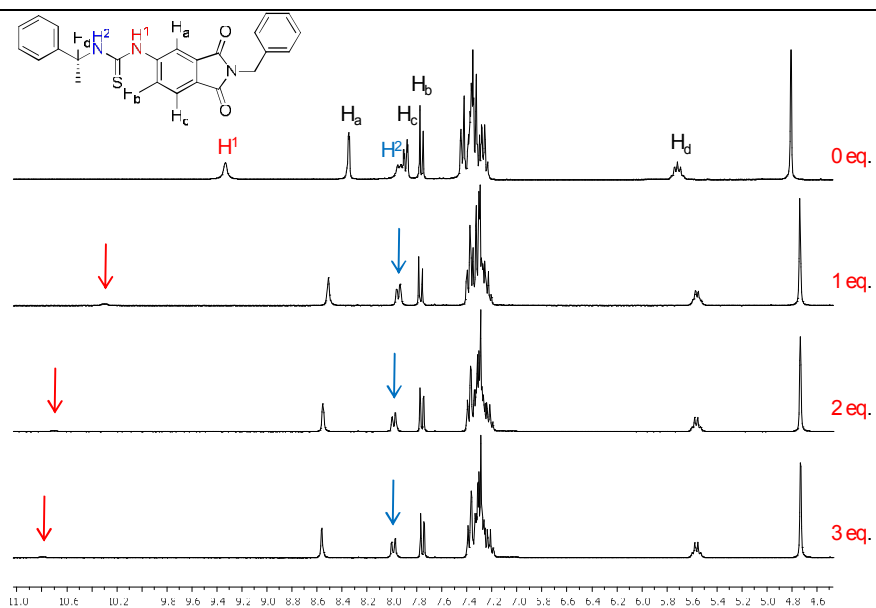

Fig. 14 Changes in  $^1\text{H}$  NMR (300MHz) spectra of **1** in DMSO upon addition of L-lactate.

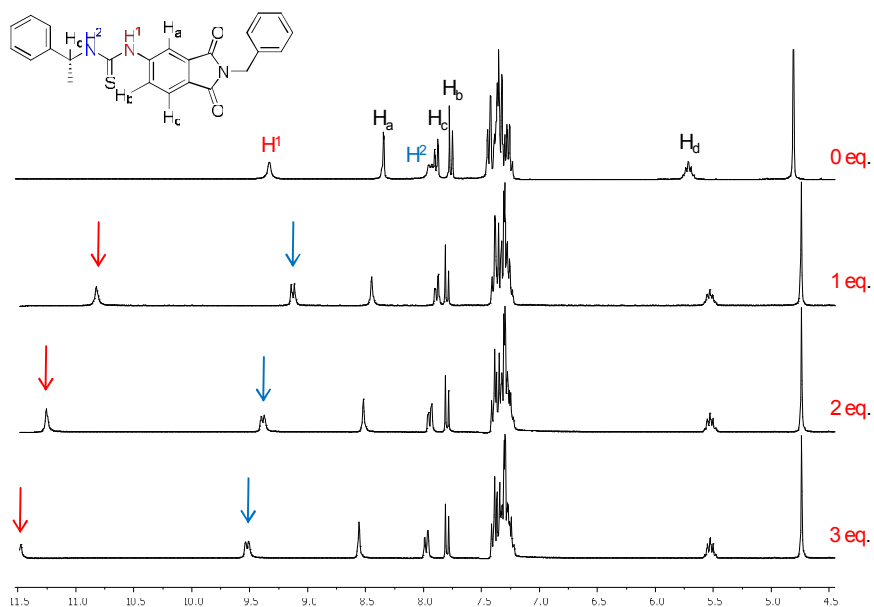

Fig. 15 Changes in  $^1\text{H}$  NMR (300MHz) spectra of **1** in DMSO upon addition of chloride.

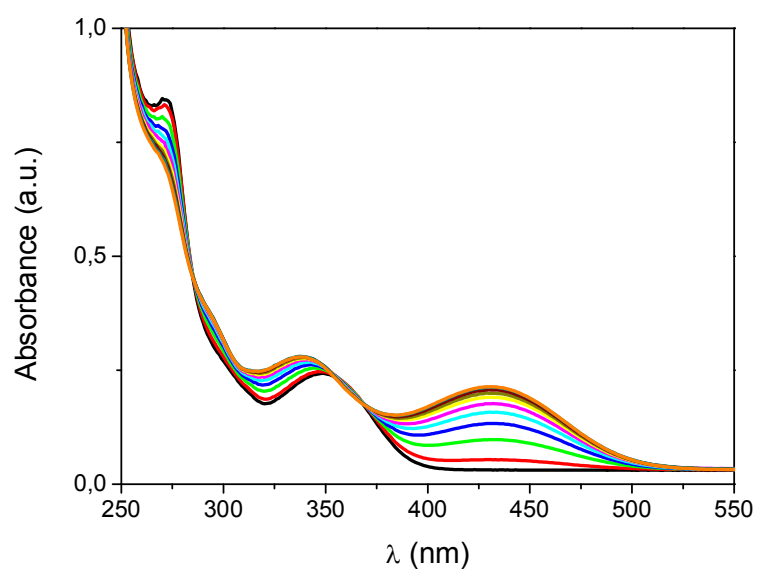

**Fig. 16** Absorption spectra of **1** ( $3.3 \times 10^{-5}$  M) in the presence of increasing amounts of DBU (0.033  $\rightarrow$  0.3 mM) in acetonitrile.

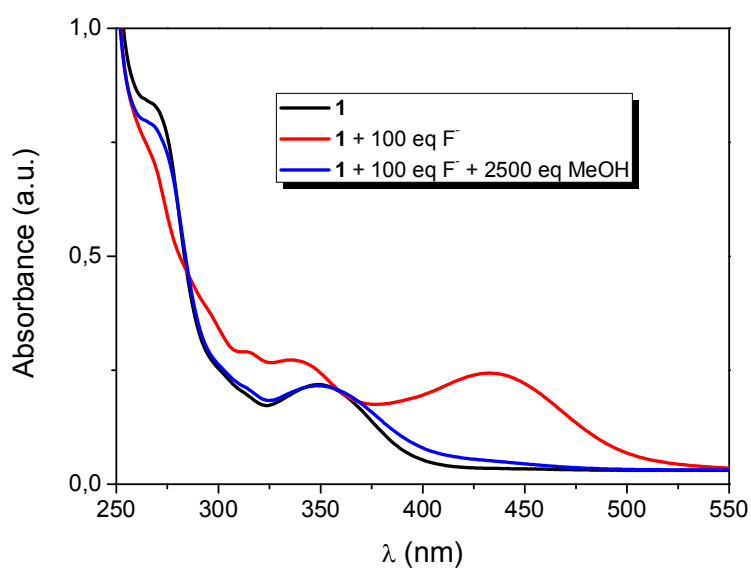

**Fig. 17** Absorption spectra of **1** ( $3.3 \times 10^{-5}$  M) in the presence of a large fluoride excess and sensor reversibility after addition of methanol.

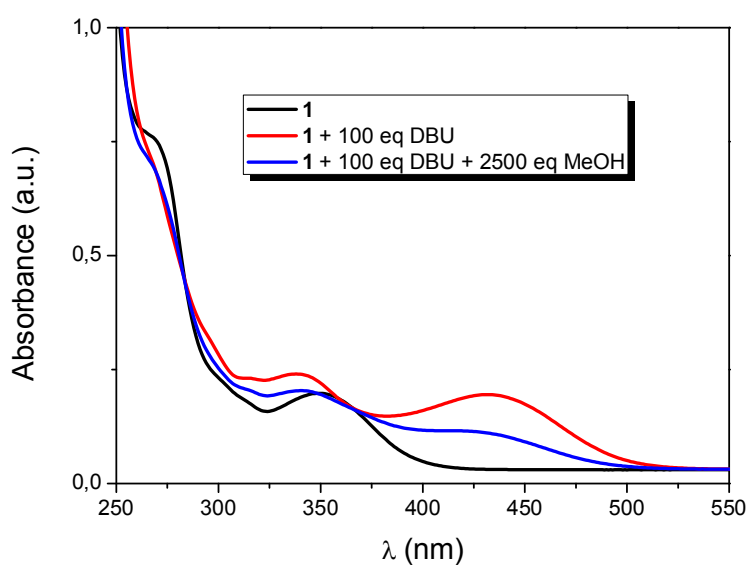

**Fig. 18** Absorption spectra of **1** ( $3.3 \times 10^{-5}$  M) in the presence of a large excess of the base DBU and sensor reversibility after addition of methanol.

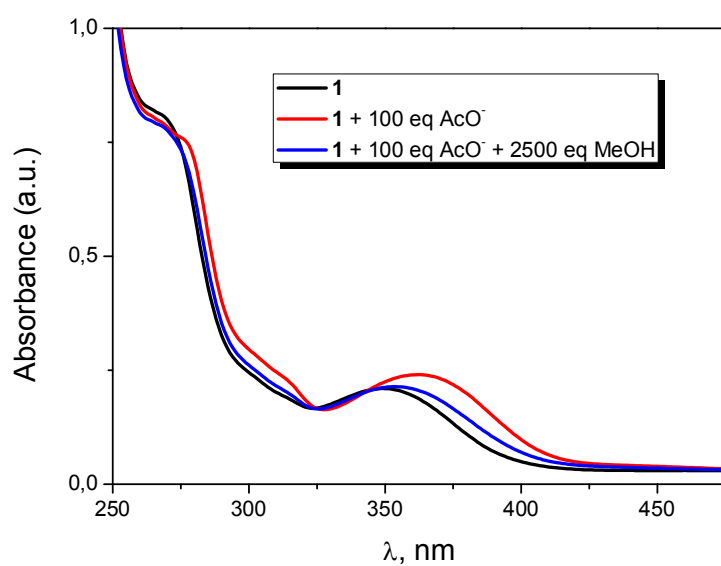

**Fig. 19** Absorption spectra of **1** ( $3.3 \times 10^{-5}$  M) in the presence of a large acetate excess and sensor reversibility after addition of methanol.

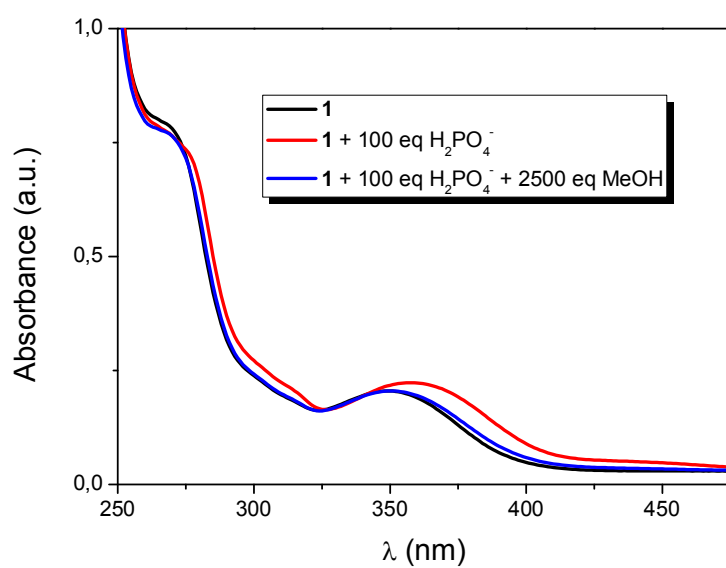

**Fig. 20** Absorption spectra of **1** ( $3.3 \times 10^{-5}$  M) in the presence of a large dihydrogenphosphate excess and sensor reversibility after addition of methanol.
